# Supplementary material for: Chemical pressure–chemical knowledge: squeezing bonds and lone pairs within the valence shell electron pair repulsion model
Source: Royal Society of Chemistry journal article supplement (doi:10.1039/c9cp00913b), 2019-01-01
Supplement: c9cp00913b1.pdf [file c9cp00913b1.pdf]

**Supporting Information for**

**Chemical Pressure-Chemical Knowledge:  
Squeezing Bonds and Lone Pairs within  
the Valence Shell Electron Pair Repulsion  
Model**

A. Lobato,<sup>\*a</sup> H. H. Osman,<sup>b</sup> M. A. Salvadó,<sup>b</sup> M. Taravillo,<sup>a</sup>  
V. G. Baonza<sup>a,c</sup> and J. M. Recio<sup>\*b</sup>

- a. Malta-Consolider Team, Dpto. de Química Física, Facultad de Ciencias Químicas, Universidad Complutense de Madrid, 28040 Madrid, Spain.
- b. MALTA-Consolider Team, Dpto de Química Física y Analítica, Universidad de Oviedo, E-33006 Oviedo, Spain.
- c. Instituto de Geociencias IGEO (CSIC-UCM), 28040 Madrid, Spain.

## Computational details of studied molecules

Table S1: Calculation details and geometrical parameters of the molecules studied.

| Molecule         | ecut (ha) | k-points | nfft grid   | Bond Length (Å)                                                  | Bond Angle (deg)                                                                   |
|------------------|-----------|----------|-------------|------------------------------------------------------------------|------------------------------------------------------------------------------------|
| H <sub>2</sub> O | 270       | 1x1x1    | 288x288x288 | d(O-H) = 0.97120                                                 | $\alpha$ (H-O-H) = 104.92                                                          |
| NH <sub>3</sub>  | 220       | 1x1x1    | 256x256x256 | d(N-H) = 1.0217                                                  | $\alpha$ (H-N-H) = 107.26                                                          |
| NF <sub>3</sub>  | 300       | 1x1x1    | 300x300x300 | d(N-F) = 1.37301                                                 | $\alpha$ (F-N-F) = 101.70                                                          |
| AsH <sub>3</sub> | 280       | 1x1x1    | 288x288x288 | d(As-H) = 1.52132                                                | $\alpha$ (H-As-H) = 90.62                                                          |
| PH <sub>3</sub>  | 240       | 1x1x1    | 270x270x270 | d(P-H) = 1.42719                                                 | $\alpha$ (H-P-H) = 91.83                                                           |
| PF <sub>3</sub>  | 290       | 1x1x1    | 300x300x300 | d(P-F) = 1.56403                                                 | $\alpha$ (F-P-F) = 97.44                                                           |
| PCl <sub>3</sub> | 270       | 1x1x1    | 290x290x290 | d(P-Cl) = 2.03959                                                | $\alpha$ (Cl-P-Cl) = 100.36                                                        |
| SO <sub>2</sub>  | 260       | 1x1x1    | 288x288x288 | d(S-O) = 1.4281                                                  | $\alpha$ (O-S-O) = 119.54                                                          |
| SF <sub>4</sub>  | 280       | 1x1x1    | 290x290x290 | d(S-F) <sub>ax</sub> = 1.6482<br>d(S-F) <sub>eq</sub> = 1.5541   | $\alpha$ (F-S-F) <sub>ax</sub> = 173.07<br>$\alpha$ (F-S-F) <sub>eq</sub> = 100.61 |
| ClF <sub>3</sub> | 360       | 1x1x1    | 324x324x324 | d(Cl-F) <sub>ax</sub> = 1.6921<br>d(Cl-F) <sub>eq</sub> = 1.6026 | $\alpha$ (F-Cl-F) <sub>ax</sub> = 176.9<br>$\alpha$ (F-Cl-F) <sub>eq</sub> = 88.19 |
| XeF <sub>2</sub> | 380       | 1x1x1    | 340x340x340 | d(Xe-F) = 2.0084                                                 | $\alpha$ (F-Xe-F) = 179.99                                                         |
| BeH <sub>2</sub> | 290       | 1x1x1    | 290x290x290 | d(Be-H) = 1.3167                                                 | $\alpha$ (H-Be-H) = 179.99                                                         |
| BH <sub>3</sub>  | 280       | 1x1x1    | 280x280x280 | d(B-H) = 1.1983                                                  | $\alpha$ (H-B-H) = 120.00                                                          |
| BF <sub>3</sub>  | 320       | 1x1x1    | 320x320x320 | d(B-F) = 1.3104                                                  | $\alpha$ (F-B-F) = 119.99                                                          |
| Ethylene         | 300       | 1x1x1    | 300x300x300 | d(C-C) = 1.3309<br>d(C-H) = 1.0852                               | $\alpha$ (H-C-H) = 119.49                                                          |

### Chemical Pressure distribution in $\text{BH}_3$ Molecule

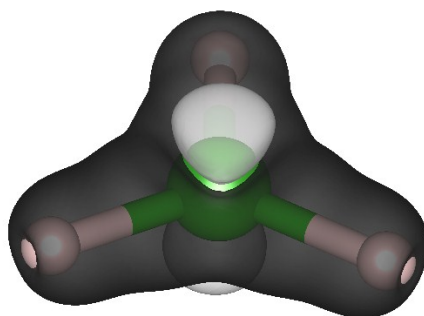

**Figure S1.** 3D isosurfaces of chemical pressure (CP) distributions within the  $\text{BH}_3$  molecule. Isosurface values:  $\text{CP}=+0.013$  (white) and  $-0.013$  (black). Green and white spheres indicate boron and hydrogen atoms, respectively.

### Chemical Pressure distribution in $\text{BF}_3$ Molecule

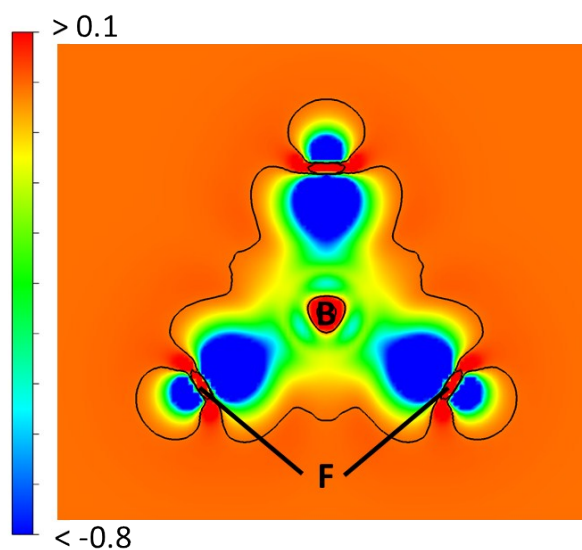

**Figure S2.** Chemical pressure heat-maps of the  $\text{BF}_3$  molecule along the molecular plane. Black curves:  $\text{CP} = 0$  contour.
